# Supplementary material for: Research progress in toxicological effects and mechanism of aflatoxin B1 toxin
Source: PeerJ. 2022 Aug 4;10:e13850. doi: 10.7717/peerj.13850 (PMC9357370; doi:10.7717/peerj.13850)
Supplement: Supplemental Information 1 — The number list of articles searched via databases. [file peerj-10-13850-s001.xlsx]

## Sheet: Sheet1
		Supplemental table 1. Summarized the number of literatures searched via databases.
		search term	Pubmed	Web of science
		aflatoxin B1	7715	11741
		toxicokinetics of aflatoxin B1	740	53
		hepatotoxicity of aflatoxin B1	249	304
		enterotoxicity of aflatoxin B1	2	3
		nephrotoxicity of aflatoxin B1	32	53
		neurotoxicity of aflatoxin B1	22	32
		immunotoxicity of aflatoxin B1	66	84
		reproductive toxicity of aflatoxin B1	125	229
		aflatoxin B1 and COX2	14	6
		aflatoxin B1 and Nrf2	59	81
		aflatoxin B1 and p53	302	453
		aflatoxin B1 and microRNA	27	25
		aflatoxin B1 and lncRNA	7	4
		aflatoxin B1 and livestock	88	187
		total	1733	1514
